# Supplementary material for: Glutamic acid decarboxylase 1 alternative splicing isoforms: characterization, expression and quantification in the mouse brain
Source: PubMed Central journal article supplement (PMC4295415; doi:10.1186/1471-2202-15-114), 2014-10-16
Supplement: 12868_2014_3802_MOESM1_ESM.pdf [file 12868_2014_3802_MOESM1_ESM.pdf]

Supplement 1. Sequence of the standards used for the quantitative RT-PCR.

Standard-1

Exon 1 → Exon 2 → *Isoform 3/4* → GAPDH

tttCTTCTTCAGGCTCTCCCGTGCcggaccagggatcgtgcaagcaaggaagcagccctggggtgacaccagcacgtactc  
ctgtgacagagccgagcccagcccagccccgggacgcttcgagaggagtcgcgagggtccagctcgtgctgaaccgagcctgttc  
ctgcgccagctcgcggggacccttgaaccGTAGAGACCCCAAGACCACCGAGttttTCTCCTTTTTACCCT  
CTGCCAccttctctggctcagtgaaacgaactctggggactaggtagagtagaaacagtgaaatctgggacggagcctcgtctagggtga  
gaaagctagAAACGAGGTGGGACAAGAACTttttAGTGTGACCTCCAGAGGTTTcacatgaaattgca  
cccgtgtttgttctcatggaacagattactcttaagaagatgagagagatcgttggatggtaataaagatggatgggatattttCTCCTGG  
GGGAGCCATATCCAttttGCATGGCCTTCCGTGTTTctaccccaatgtgtccgctcgtggatctgacgtgccgctg  
gagaaacctgccaagatgatgacaTCAAGAAGGTGGTGAAGCAGGttt

Standard-2

*Isoform 1/2* → GAD2 → GAPDH

tttTCGATTTTTCAACCAGCTCTCTACTggtttggatcattggttagctggatgctgacatcgactgccaataccA  
ATATGTTACATATGAAATTGCACttttCATTGATAAGTGTGGAGCTAGCAgagtattatacact  
atcataaaaaaccgagaaggctatgaaatggtgttggatgggaagcctcaacacacaaatgtctgcttctggTTGTACCTCCTAGTT  
TGCGCACttttGCATGGCCTTCCGTGTTTctaccccaatgtgtccgctcgtggatctgacgtgccgctggagaaacctgc  
caagatgatgacaTCAAGAAGGTGGTGAAGCAGGttt

Standard-3

*Isoform 7/8* → *Isoform 9/10* → *Isoform 5/6* → GAPDH

tttCACTTGGCTGGGTTCGGTCTAggcatctcttccagctaggtggtcttgctcagcctacagacaccaaagcttaagaactc  
aaggcaaagcaagaaaaagagccttagcgttagtaAACGGATTCTGTCTTTAGGCTCAttttTGACTTTCTCCC  
CTTACTTGACATTAaaccatgtattactcagcatcatgtctgtgagaactaaaagcaaatctgggttgggctaatgtacctgcctgtg  
aagccaacacttAGAAAATGAGGGTGAGATCAAGAAGttttTGACCTCCAGAGGTGATGGTtcacata  
tgaattgcaccctgtttgttctcatggaacagattactcttaagaagatgagagagatcgttggatggtaataaagatggatgggatattttC  
TCCTGGGGGAGCCATATCCAttttGCATGGCCTTCCGTGTTTctaccccaatgtgtccgctcgtggatctgacg  
tgccgctggagaaacctgccaagatgatgacaTCAAGAAGGTGGTGAAGCAGGttt
