# Supplementary material for: Glutamic acid decarboxylase 1 alternative splicing isoforms: characterization, expression and quantification in the mouse brain
Source: PubMed Central journal article supplement (PMC4295415; doi:10.1186/1471-2202-15-114), 2014-10-16
Supplement: 12868_2014_3802_MOESM2_ESM.pdf [file 12868_2014_3802_MOESM2_ESM.pdf]

Supplement 2. Statistical analysis of the data from quantitative RT-PCR experiments.

A. Comparison of the expression of each GAD1 isoform and GAD2 between the various mouse brain regions as analyzed by one-way ANOVA followed by Tukey's post hoc test. \*\*  $P \leq 0.0001$ , \*  $P < 0.05$ , *ns* – not significant. (Olf) olfactory bulb; (Fr) frontal cortex; (CpuM) medial striatum; (CpuL) lateral striatum; (Hp) hippocampus; (Crb) cerebellum.

|         | Olf-Fr | Olf-CpuM | Olf-CpuL | Olf-Hp | Olf-Crb | Fr-CpuM | Fr-CpuL | Fr-Hp | Fr-Crb | CpuM-CpuL | CpuM-Hp | CpuM-Crb | CpuL-Hp | CpuL-Crb | Hp-Crb |
|---------|--------|----------|----------|--------|---------|---------|---------|-------|--------|-----------|---------|----------|---------|----------|--------|
| Is 1/2  | **     | **       | **       | **     | **      | **      | **      | ns    | *      | *         | **      | ns       | **      | *        | *      |
| Is 3/4  | **     | **       | **       | **     | **      | ns      | ns      | ns    | ns     | ns        | ns      | ns       | ns      | ns       | ns     |
| Is 5/6  | **     | **       | **       | **     | **      | ns      | ns      | ns    | ns     | ns        | ns      | ns       | ns      | ns       | ns     |
| Is 7/8  | **     | *        | *        | **     | **      | ns      | *       | ns    | ns     | ns        | ns      | ns       | *       | *        | ns     |
| Is 9/10 | **     | *        | *        | **     | **      | ns      | *       | ns    | ns     | ns        | ns      | ns       | *       | ns       | ns     |
| GAD2    | **     | ns       | ns       | **     | **      | **      | **      | ns    | ns     | ns        | **      | **       | **      | **       | ns     |

B. Comparison of the expression of each GAD1 isoform and GAD2 in one brain region as analyzed by one-way ANOVA followed by Tukey's post hoc test. \*\*  $P \leq 0.0001$ , \*  $P < 0.05$ , *ns* – not significant. (Olf) olfactory bulb; (Fr) frontal cortex; (CpuM) medial striatum; (CpuL) lateral striatum; (Hp) hippocampus; (Crb) cerebellum.

|      | 1/2-3/4 | 1/2-5/6 | 1/2-7/8 | 1/2-9/10 | 1/2-GAD2 | 3/4-5/6 | 3/4-7/8 | 3/4-9/10 | 3/4-GAD2 | 5/6-7/8 | 5/6-9/10 | 5/6-GAD2 | 7/8-9/10 | 7/8-GAD2 | 9/10-GAD2 |
|------|---------|---------|---------|----------|----------|---------|---------|----------|----------|---------|----------|----------|----------|----------|-----------|
| Olf  | **      | **      | *       | *        | *        | *       | *       | *        | *        | *       | *        | *        | *        | *        | *         |
| Fr   | *       | *       | *       | *        | *        | ns      | *       | *        | *        | *       | *        | *        | *        | *        | *         |
| CpuM | *       | *       | *       | *        | ns       | ns      | *       | *        | *        | *       | *        | *        | *        | *        | *         |
| CpuL | *       | *       | *       | *        | *        | ns      | ns      | ns       | *        | ns      | ns       | *        | ns       | *        | *         |
| Hp   | *       | *       | *       | *        | *        | ns      | ns      | ns       | *        | ns      | ns       | *        | ns       | *        | *         |
| Crb  | **      | **      | **      | **       | *        | *       | ns      | ns       | **       | ns      | ns       | *        | *        | *        | *         |

C. Expression of Exon1 and Exon2 in each of the investigated brain regions as evaluated by Mann-Whitney U test. \*  $P < 0.05$ . (CpuM) medial striatum; (CpuL) lateral striatum.

|             | Olfactory bulb | Frontal cortex | CpuM | CpuL | Hippocampus | Cerebellum |
|-------------|----------------|----------------|------|------|-------------|------------|
| Exon1-Exon2 | *              | *              | *    | *    | *           | *          |

D. Comparison of the expression of Exon1 and Exon2 between the various mouse brain regions as analyzed by one-way ANOVA followed by Tukey's post hoc test. \*\*  $P \leq 0.0001$ , \*  $P < 0.05$ , *ns* – not significant. (Olf) olfactory bulb; (Fr) frontal cortex; (CpuM) medial striatum; (CpuL) lateral striatum; (Hp) hippocampus; (Crb) cerebellum.

|        | Olf-Fr | Olf-CpuM | Olf-CpuL | Olf-Hp | Olf-Crb | Fr-CpuM | Fr-CpuL | Fr-Hp | Fr-Crb | CpuM-CpuL | CpuM-Hp | CpuM-Crb | CpuL-Hp | CpuL-Crb | Hp-Crb |
|--------|--------|----------|----------|--------|---------|---------|---------|-------|--------|-----------|---------|----------|---------|----------|--------|
| Exon 1 | **     | **       | **       | **     | **      | **      | **      | ns    | ns     | ns        | **      | *        | **      | **       | ns     |
| Exon 2 | **     | ns       | ns       | **     | **      | *       | **      | ns    | ns     | *         | *       | *        | **      | **       | ns     |
